# Supplementary material
Source: Springer Nature journal article supplement (https://www.springermedizin.de/resource/supplementary/12955_2013_1169_MOESM1_ESM.pdf/9558960)

# Proportions in the levels of the EQ-5D dimensions

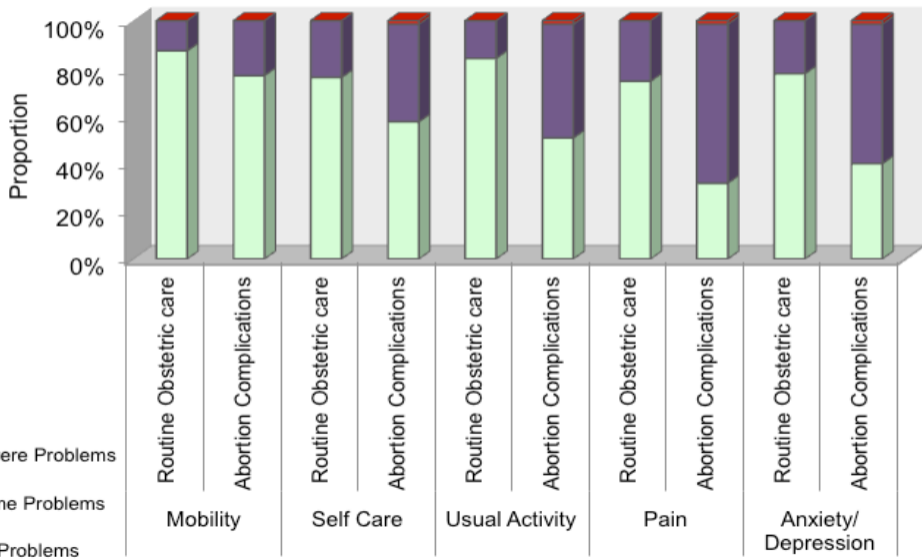

Supplement: MOESM1 [file 9558960]
